# Supplementary material for: Cytomegalovirus-Associated Autoantibody against TAF9 Protein in Patients with Systemic Lupus Erythematosus
Source: MDPI journal article supplement (doi:10.3390/jcm10163722), 2021-08-21
Supplement: s1 [file s1]

# Cytomegalovirus-Associated Autoantibody against TAF9 Protein in Patients with Systemic Lupus Erythematosus

Yen-Fu Chen <sup>1,†</sup>, Ao-Ho Hsieh <sup>1,†</sup>, Lian-Chin Wang <sup>1</sup>, Kuang-Hui Yu <sup>1,\*</sup> and Chang-Fu Kuo <sup>1,2,\*</sup>

1 Division of Rheumatology, Allergy and Immunology, Chang Gung Memorial Hospital, Taoyuan 333, Taiwan; patrichen0693@gmail.com (Chen, Y.-F.); mayitsu2006@gmail.com (Hsieh, A.-H.); lian.chin.wang@gmail.com (Wang, L.-C.)

2 Center for Artificial Intelligence in Medicine, Chang Gung Memorial Hospital, Taoyuan 333, Taiwan

\* Correspondence: zandis@gmail.com (Kuo, C.-F); goutyu@gmail.com (Yu, K.-H); Tel.: +886-(03)-328-1200

† Equal contribution.

## Supplemental tables

**Table S1.** The measurement of CMV IgG avidity in SLE patients with CMV IgG positive

| CMV IgG positive (SLE, n=163) | Anti-CMV IgM    |                  |
|-------------------------------|-----------------|------------------|
|                               | Positive (n=21) | Negative (n=142) |
| High avidity (>60%)           | 10              | 115              |
| Intermediate avidity (30-60%) | 11              | 27               |
| Low avidity (<30%)            | 0               | 0                |

**Table S2.** The measurement of CMV IgG avidity in SS patients with CMV IgG positive

| CMV IgG positive (SS, n=64)   | Anti-CMV IgM   |                 |
|-------------------------------|----------------|-----------------|
|                               | Positive (n=5) | Negative (n=59) |
| High avidity (>60%)           | 3              | 39              |
| Intermediate avidity (30-60%) | 2              | 20              |
| Low avidity (<30%)            | 0              | 0               |

**Table S3.** The measurement of CMV IgG avidity in RA patients with CMV IgG positive

| CMV IgG positive (RA, n=76)   | Anti-CMV IgM   |                 |
|-------------------------------|----------------|-----------------|
|                               | Positive (n=2) | Negative (n=74) |
| High avidity (>60%)           | 2              | 49              |
| Intermediate avidity (30-60%) | 0              | 25              |
| Low avidity (<30%)            | 0              | 0               |

**Table S4.** The measurement of CMV IgG avidity in gout patients with CMV IgG positive

| CMV IgG positive (Gout, n=70) | Anti-CMV IgM   |                 |
|-------------------------------|----------------|-----------------|
|                               | Positive (n=3) | Negative (n=67) |
| High avidity (>60%)           | 3              | 53              |
| Intermediate avidity (30-60%) | 0              | 14              |
| Low avidity (<30%)            | 0              | 0               |

**Table S5.** The measurement of CMV IgG avidity in AS patients with CMV IgG positive

| CMV IgG positive (AS, n=52)   | Anti-CMV IgM   |                 |
|-------------------------------|----------------|-----------------|
|                               | Positive (n=2) | Negative (n=50) |
| High avidity (>60%)           | 1              | 30              |
| Intermediate avidity (30-60%) | 1              | 20              |
| Low avidity (<30%)            | 0              | 0               |
